# Supplementary material
Source: PubMed Central journal article supplement (PMC10440849)
Supplement: NIHMS1869329-supplement-1.pdf [file NIHMS1869329-supplement-1.pdf]

## Online Supplemental Figures

### eFigure 1. Interview Guide in Spanish and English

#### SPANISH

### **GRUPO FOCAL SOBRE EXPERIENCIAS CON LA PLANIFICACIÓN DE VOLUNTAD ANTICIPADA: PARA PACIENTES HISPANOHABLANTES**

#### **Información general**

El objetivo principal del grupo focal es entender las experiencias concretas, si las hay, que constituyen la interacción de una persona hispanohablante con un proveedor de atención de salud, especialmente en lo relacionado con las conversaciones sobre la Planificación de Voluntad Anticipada (ACP). La planificación de voluntad anticipada es un proceso que le permite a los pacientes identificar sus objetivos en relación con la atención de salud. Tradicionalmente, la ACP se ha centrado en completar los documentos de voluntad anticipada, pero ahora incluye preparar a los pacientes para que comuniquen sus deseos y tomen decisiones con pleno conocimiento. Con este fin, pediremos a los participantes que hagan descripciones abiertas de las experiencias que hayan tenido acerca del tema con su proveedor de atención de salud.

#### **Personal mínimo**

1. Un moderador que hable español con fluidez y un intérprete acreditado.
2. Una persona que hable español con fluidez que se responsabilice de la grabación, de tomar apuntes sobre lo bien que funciona el grupo focal y de comentar si alguno de los participantes pareciera sentirse incómodo.
3. Alguien que se responsabilice de la organización en general.

#### **Programa del grupo focal**

- 1) El/La moderador/a comienza presentándose al grupo. Luego, empieza por el consentimiento informado y se asegura de responder cualquier pregunta que le hagan al respecto. El/La moderador/a explicará por qué se ha reunido este grupo focal y expone de manera breve cómo se realizará la sesión del grupo focal. La explicación debe hacerse de esta manera:

**Nos hemos reunido para hablar de sus experiencias con su proveedor de atención de salud sobre la Planificación de Voluntad Anticipada. La Planificación de Voluntad Anticipada es un proceso que le permite a los pacientes identificar sus objetivos en relación con la atención de salud. Tradicionalmente, la ACP se ha centrado en completar los documentos de voluntad anticipada, pero ahora incluye preparar a los pacientes para que comuniquen sus deseos y tomen decisiones con pleno conocimiento. Lo que conversemos aquí se mantendrá en confidencialidad. Voy a comenzar por pedirles que describan de manera muy breve sus experiencias generales con la Planificación de Voluntad**

**Anticipada, si las han tenido. Luego les pediremos que revisen algunos documentos que se le dan a los pacientes para ayudarlos con la Planificación de Voluntad Anticipada y que nos den su opinión sobre dichos documentos. La sesión completa durará unas 3 horas. Durante este tiempo les ofreceremos algo de comer y beber. Grabaremos la sesión, pero nada de lo que digan podrá vincularse con ustedes. Vamos a grabar la sesión porque necesitamos tener un registro exacto de las conversaciones.**

El/La moderador/a prosigue con la presentación del resto del equipo.

- 2) El moderador invita a los participantes del grupo focal a presentarse ellos mismos.
- 3) El moderador inicia la conversación con la siguiente oración introductoria:

**Ahora, brevemente, ¿podría cada uno de ustedes por favor decir lo que entiende en general por Planificación de Voluntad Anticipada? ¿Alguno había oído hablar anteriormente de la Planificación de Voluntad Anticipada? ¿Quién quiere comenzar?**

- 4) Después de que todos hayan dado sus opiniones o respuestas, diga que le gustaría concentrarse en las experiencias específicas relacionadas con la ACP.

**Ahora, ¿cuántos de ustedes han tenido una conversación sobre la ACP con las personas que conocen? Usualmente las personas hablan de este tema con alguien de su familia, pero también pueden hablar con un abogado o con un proveedor de atención de salud. Quienes hayan tenido esta experiencia traten de recordarla con el mayor detalle posible. Ahora, ¿quisieran compartirla con nosotros lo mejor que puedan?**

**¿Alguna vez les ha dado su proveedor de atención de salud algún tipo de folleto o guía de conversación acerca de la ACP? Si fue así, ¿les pareció útil y fácil de entender?**

**Para quienes no hayan tenido una conversación sobre la ACP con su proveedor de atención de salud: ¿por qué creen que este tema no se ha mencionado?**

- 5) Después de que todas las personas que querían compartir sus historias hayan respondido, indique que ahora quiere concentrarse en revisar ejemplos de documentos de ACP, entre ellos, la *Designación de un apoderado para atención de salud* y el formulario de *Voluntad personal*. (Estos documentos se habrán entregado a los participantes antes de la reunión para que los revisaran.)

**Ahora, quiero pasar al tema de los formularios de ACP. ¿Cuántos de ustedes han recibido un formulario de ACP de un proveedor de atención de salud?**

Antes de esta sesión, les dimos ejemplos de estos formularios de ACP. No importa si no han tenido la oportunidad de revisarlos; aquí tenemos los formularios. Uno es un documento llamado formulario de *Voluntad personal* en el que pueden indicar sus preferencias en relación con la atención de salud. El otro es un formulario de *Designación de un apoderado para atención de salud*, en el que pueden indicar a quién eligen para que tome decisiones médicas en su nombre, si ustedes están demasiado enfermos para hacerlo por sí mismos.

¿Pueden decirme qué opinan del formulario de *Voluntad personal*? ¿Hay partes difíciles de entender? ¿Hay partes difíciles de completar?

¿Pueden decirme que opinan del formulario de *Designación de un apoderado para atención de salud*? ¿Hay partes difíciles de entender? ¿Hay partes difíciles de completar?

- 6) Después de que todas las personas que querían compartir sus historias hayan respondido, indique que ahora quiere concentrarse en lo que ellos consideran valores esenciales en relación con la atención de salud.

**Muchas gracias a todos por su participación. Por último, me gustaría finalizar la sesión pidiéndoles que piensen por un momento en qué es lo más importante para ustedes cuando consultan a un proveedor de atención de salud. Sé que las conversaciones sobre la atención de salud al final de la vida no son un tema muy fácil para pensar, especialmente si nunca antes habían hablado de esto, pero ¿cuáles serían las cosas más importantes que ustedes tendrían en cuenta al conversar con su proveedor de atención de salud o incluso con un familiar?**

- 7) El moderador debe finalizar la sesión agradeciendo a todos por su participación en el grupo focal.

Por ejemplo: **Sus historias han sido muy interesantes y nos han enseñado mucho. Muchas gracias por dedicar tiempo para participar en esta conversación tan importante.**

## ENGLISH

### FOCUS GROUP ON HEALTH CARE EXPERIENCES WITH ADVANCE CARE PLANNING: SPANISH SPEAKING PATIENTS

#### **Background**

The main purpose of the focus group is to understand what concrete experiences (if any) constitute a Spanish-speaking person's encounter with a health care provider, specifically in regards to Advance Care Planning conversations. Advance care planning is a process that allows

patients to identify their goals for medical care. Traditionally, ACP has focused on completing advance directives, however this now includes preparing patients to communicate their wishes and make informed decisions. In order to do this we will be asking participants for open-ended descriptions of experiences they have had with their health care provider on this topic.

### Minimum Staff

4. Moderator who is fluent in Spanish and a credentialed interpreter
5. A person fluent in Spanish who is responsible for the taping, and making notes on how well the focus group is running, commenting whether there are any people who seem uncomfortable
6. Someone responsible for general organization

### The Focus Group Agenda

- 8) The moderator first starts off by introducing him/herself. They will then begin by going over the informed consent and making sure to answer any questions. The moderator will explain why the focus group has been gathered along with a brief outline of how the focus group will be run. The explanation should read as follows:

**We are meeting to discuss your experiences with your health care provider regarding Advance Care Planning.** Advance care planning is a process that allows patients to identify their goals for medical care. Traditionally, ACP has focused on completing advance directives, however this now includes preparing patients to communicate their wishes and make informed decisions. **What we discuss here will remain confidential. I will start by asking you to describe very briefly your general experience, if any, with Advance Care Planning. We will then ask you to review and provide your opinion about some documents that are given to patients to help them with Advance Care Planning. The entire session will take about 3 hours. During this time we will provide you with something to eat and drink. We will audio record the sessions but nothing you say will be linked to you. We are recording the session because we need to have an accurate record of the discussions.**

The moderator goes on to introduce the team.

- 9) The moderator invites the members of the focus group to introduce themselves.
- 10) The moderator then starts the discussion with the following opening sentence:

**Now, very briefly, would each of you please describe your general understanding of Advance Care Planning? Has anyone ever heard of Advance Care Planning before today? Who would like to start?**

- 11) After everyone has given their opinion/answers, indicate that you would like to focus on specific experiences with ACP.

**Now, how many of you have had a discussion about ACP with people you know. Folks usually have these conversations with people in their family, but they can also occur with your lawyer or your healthcare provider? Those of you who have had this experience try and remember as much detail as possible about it. Now, can you walk us through that as best you can?**

**Has your healthcare provider ever shared with you any type of pamphlet or conversation guides regarding ACP? If so, did you find this helpful and easy to understand?**

**For those of you who haven't had a conversation about ACP with your healthcare providers: Why do you feel this topic hasn't come up?**

- 12) After everyone who wished to share their stories has given their response, indicate that you would now like to focus on reviewing examples of ACP documents, including a Health Care Proxy and Personal Directives form (these will have been provided before the focus group for their review.

**Now, I'd like to move on to the topic ACP forms. How many of you have received an ACP form from a provider?**

**Before this session, we provided examples of ACP forms. It is ok if you have not had a chance to review them. We have the forms here. One is a form called a Personal Directives form where you can indicate your preferences for health care. The other form is a Health Care Proxy form where you can indicate who you want to make medical decisions for you if you are too sick to do so yourself.**

**Can you provide your opinion about the Personal Directives form. Are there sections that are hard to understand? Are there sections that are hard to fill out?**

**Can you provide your opinion about the Health Care Proxy form. Are there sections that are hard to understand? Are there sections that are hard to fill out?**

- 13) After everyone who wished to share their stories has given their response, indicate that you would now like to focus on their key values when it comes to their health care.

**Thank you all so much for sharing. Lastly, I'd like to end the session by having everyone take a moment and think about what is most important to you when it comes to visits with a healthcare provider. I know end-of-life care isn't the easiest topic to think about, especially if you have never talked about it before, but what would be some of the most important things for you**

**to consider when having this discussion with your provider or even a family member?**

- 14) The moderator should close the session by thanking everyone for their participation in the focus group:

**E.g., Your stories have been very insightful and interesting. Thank you all so much for taking the time to participate in this important discussion.**

## eFigure 2. Interview Probe Supplement in Spanish and English

### SPANISH

Planificación de Voluntad Anticipada (ACP, *Advance Care Planning*)

Grupo focal: Clarificaciones y preguntas de sondeo/seguimiento

PREGUNTA DE SONDEO: ¿Puedo clarificar qué es la planificación de voluntad anticipada?

- Las conversaciones de planificación de voluntad anticipada de atención de salud son diálogos entre pacientes, cuidadores/proveedores de cuidados y profesionales clínicos sobre las preferencias acerca de los cuidados médicos futuros si es que la salud de una persona empeora. Estas conversaciones pueden estar relacionadas con los valores personales de uno, las esperanzas, y las metas y preocupaciones sobre el futuro que puedan influenciar el tipo de cuidados médicos que uno pueda recibir. Utilizamos el término ‘profesional clínico’ para referirnos a miembros de su equipo de salud, incluyendo a médicos(as), enfermeros(as), trabajadores sociales y capellanes.

PREGUNTA DE SONDEO: ¿Puedo clarificar qué es una voluntad personal anticipada?

- Una voluntad personal anticipada es una declaración por escrito de los deseos de una persona relacionados con el tratamiento médico; incluidas las instrucciones específicas acerca del tipo de cuidados que ellos deseen tener o no. Esta declaración se comparte con su agente/representante de decisiones médicas (esta persona es elegida por alguien para tomar decisiones médicas cuando ésta no pueda tomar decisiones por sí misma) y un profesional clínico.

PREGUNTA DE SONDEO: ¿Puedo dar un ejemplo de una presentación?

- Usted puede brevemente decir su primer nombre y una (1) cosa que usted piensa que es importante que las personas sepan sobre usted para que ellos puedan entender sus perspectivas sobre las conversaciones de planificación de voluntad anticipada de atención de salud. Por ejemplo: *Mi nombre es Germán. Yo soy el padre de dos niños pequeños; y he sido intérprete para algunas conversaciones sobre planificación de voluntad anticipada de atención de salud en el hospital.*

PREGUNTA DE SONDEO: Experiencia personal

- ¿Tuvo usted alguna experiencia personal con la planificación de voluntad anticipada de atención de salud, por ejemplo, con familiares o amigos?
- ¿Recibió [usted] información de un profesional clínico?

PREGUNTA DE SONDEO: ¿Con quién ha tenido conversaciones sobre planificación de voluntad anticipada de atención de salud?

¿Ha tenido estas conversaciones con:

- un líder religioso?
- un amigo?
- un abogado?
- otra persona?

PREGUNTA DE SONDEO: Guía de conversación

- ¿Ha visto usted una guía de conversación que le ayude a hablar con su profesional clínico sobre la planificación de voluntad anticipada de atención de salud?
- Muestre el ejemplo de la versión en español de *Conversation Project*.

PREGUNTA DE SONDEO: Barreras

- ¿Alguna vez un profesional médico le describió la planificación de voluntad anticipada de atención de salud?
- ¿Alguna vez ha considerado tener una conversación sobre planificación de voluntad anticipada de atención de salud; o ha completado un documento de voluntad anticipada y finalmente decidió no hacerlo?
  - Cuéntenos un poco más sobre eso.

PREGUNTA DE SONDEO: Formularios - Mejoras

- ¿Qué es eficaz o piensa que funciona bien en este formulario?
- ¿Qué le cambiaría [al formulario]?
- ¿Cómo puede mejorarse el formulario?

PREGUNTA DE SONDEO: Entendimiento cultural

- ¿En qué medida piensa usted que su médico entiende su perspectiva y lo que es importante para usted?
- ¿Cómo afectan sus antecedentes, religión, cultura o creencias lo que usted desea para su atención de salud y con quién quisiera usted conversar sobre su planificación de voluntad anticipada de atención de salud?

PREGUNTA DE SONDEO: Próximos pasos

- ¿Le interesaría a usted saber sobre nuestros próximos pasos?
  - Por favor, tenga por seguro que sus respuestas serán mantenidas de forma confidencial. Nosotros no asociaremos su nombre o cualquier información que lo/la pueda identificar con ninguna persona; incluido su equipo de atención de salud.
  - Después de analizar las grabaciones, haremos un resumen de los hallazgos en un reporte. Este reporte será compartido con investigadores interesados en informarse sobre cómo mejorar el proceso de planificación de voluntad anticipada de atención de salud. Si está interesado(a) en recibir una copia de este reporte, por favor déjenos saber y coordinaremos para que el CHI se comuniqué con usted cuando esté listo.

**ENGLISH**

Advance Care Planning (ACP) – Spanish-speaking persons  
Focus Group – Clarifications and Probes

PROBE: Can I clarify what advance care planning is?



- Advance care planning conversations are discussions between patients, caregivers, and clinicians about preferences for future medical care if a person's health gets worse. These conversations can include discussions about one's values, hopes, and goals and concerns about the future that could influence the type of medical care one may receive. We use the term 'clinician' to refer to members of the healthcare team, including physicians, nurses, social workers, and chaplains.

PROBE: Can I clarify what an advance directive is?

- An advance directive is a written statement of a person's wishes regarding medical treatment, including specific instructions about the kind of care they want or do not want. This statement is shared with their health care agent - who is someone chosen by the person to make health care decisions when they are unable to make decisions for themselves - and a clinician.

PROBE: Can I provide an example of an introduction?

- You can briefly state your first name and 1 thing that you think is important for people to know about you so that they can understand your perspective about advance care planning conversations. For example: My name is Germán. I am a father of two young children and have been an interpreter for some advance care planning conversations in the hospital.

PROBE: Personal experience

- Did you have any personal experience with advance care planning, for example, with family or friends?
- Did you receive information from a clinician?

PROBE: Who have you had ACP with?

Have you had these conversations with a

- Faith leader
- Friend
- Lawyer
- Anyone else?

PROBE: Conversation Guide

- Have you seen a conversation guide that helps you speak with your clinician about advance care planning?
  - Show example from Conversation Project (Spanish version)

PROBE: Barriers

- Has a clinician ever described advance care planning to you before?
- Have you ever considered having an advance care planning conversation or completing an advance directive and decided against it?

- Tell us more about that.

PROBE: Forms - Improvements

- What is effective or working on this form?
- What would you change?
- How can this be improved?

PROBE: Cultural Understanding

- How well do you think your doctor understands your perspective and what is important?
- How does your background, religion, culture, or beliefs affect what you want for medical care and who you would want to discuss your advance care plan with?

PROBE: Next Steps

- Are you interested in our next steps?
  - Please be assured that your responses will be kept confidential. We will not associate your name or other identifying information with anyone, including your health care team.
  - After we analyze the recordings, we will summarize the findings into a report. This report will be shared with researchers interested in learning how to improve advance care planning. If you are interested in receiving a copy of the report, please let us know and we will have CHI contact you when it is ready.

### eFigure 3. Full Text of Exemplar Quotes in Spanish and English with Supplemental Quotes, by Theme

#### Current ACP Translations are Confusing

*... Que se use lenguaje que la persona la cual está llenando los documentos pueda entender...muchas personas están confundidos, no saben cómo llenar, no saben qué quiere decir y prefieren no preguntar. Entonces al no preguntar, pues deciden no hacerlo por completo. Pero si los términos fueran menos técnicos, fueran más lenguaje básico, pues ya todo el mundo se hubiera sentido un poquito más con la habilidad de poder hacer esas cosas y si tienen alguna pregunta, puede – si no quieren ir a donde el doctor porque aquí cobran cada vez que entras a hablar con un doctor, le puedes preguntar a una persona que vive – un vecino, un pariente, alguien que le pueda ayudar entenderlo... (ID:1-7)*

... Use language that the person who is filling out the documents can understand...many people are confused, they do not know how to fill it out, do not know what it means and prefer not to ask. Then by not asking, they decide not to do it at all. But if the terms were less technical, if they were more basic language, everyone would have felt a little bit more with the ability to do those things and if they have any questions, they can — if they don't want to go to the doctor because here they charge every time you go to talk to a doctor, you can ask a person who lives — a neighbor, a relative, someone who can help you understand it... (ID:1-7)

*Pero una persona que ha estado radicado en este país a lo mejor tendría sentido porque es una traducción exacta de la versión de inglés, pero para una persona que acaba de venir de Bolivia no entendería qué es lo que se está diciendo. (ID:3-3)*

But for a person who has been living in this country, it might make sense because it is an exact translation of the English version, but for a person who has just come from Bolivia they would not understand what is being said. (ID:3-3)

#### Translation and Interpretation are Affected by Country of Origin

*Entonces mi país, por ejemplo, increíblemente eso no se usa. Y allá habían personas que pudieron estar hasta un año conectados y eso les trajo – como allá los seguros no funcionan como aquí, les trajo un gasto inmenso a familias, por ejemplo. Entonces, es increíblemente, impresionantemente yo estando en el campo de la medicina, yo conocí esos documentos aquí porque es que allá se sabía que hay algunos pero de eso no se habla. No sé ahora, pero no se hablaba allá, entonces el que aquí se esté como eso me llama mucho la atención. (ID:3-2)*

So my country, for example, incredibly that is not used. And there were people there who were able to stay connected for up to a year and that brought them - since insurance doesn't work there like it does here, it brought huge expenses to families, for example. So, incredibly, amazingly, being in the field of medicine, I learned about those documents here because there it was known that there are some but that are not talked

about. I don't know now, but there was no talk there, so being here like that draws my attention a lot. (ID:3-2)

*Pero hay que tomar en cuenta el factor cultural. Yo creo que en eso de verdad porque yo soy muy amiga de un médico, o sea, mis amigos médicos latinos venezolanos. Ellos le explican a su paciente de una manera y el paciente se asusta menos y lo entiende más por el mismo idioma porque cuando a uno le pregunta a una persona latina lo del proxy o lo de deseos, “Doctor, me estoy muriendo” como dice ella, así te sano y así lo pregunte en la consulta. Entonces yo creo que también hay que atacarlo del punto de vista cultural. (ID:2-5)*

But the cultural factor must be taken into account. I really think that because I'm very close to a doctor, that is, my Venezuelan Latino doctor friends. They explain it to their patient in a certain way and the patient is less scared and understands it more in the same language because when you ask a Latino person about the proxy or their desires, “Doctor, am I dying” like she says, even if they are healthy and even if they ask during their consultation. So I believe it must also be approached from a cultural point of view. (ID:2-5)

### **Importance of family.**

*Pienso que cuando se hace educación sobre esto, hay que tomar en cuenta lo importante que es la familia para nosotros porque tu puedes escoger a alguien que respete tus deseos, pero eso crea un caos si el resto no está de acuerdo. Lo que le puede pasar a cualquier cultura, pero nosotros somos una cultura que la familia es súper importante. So, pienso que eso tiene que ser considerado cuando se planifican materiales. Y cuando se está ayudando a alguien escoger el proxy, ¿cómo puede ese proxy –? O sea, le toca al proxy comunicar a los otros o a la persona que lo está llenando, cómo – cómo se ayuda a la persona a poder hacer esto con la familia (ID:3-1)*

I think that when you educate others about this, you have to take into account how important family is to us because you can choose someone who respects your wishes, but that creates chaos if the rest disagree. What can happen to any culture, but we are a culture that family is super important. So, I think that has to be considered when planning materials. And when you are helping someone choose the proxy, how can that proxy —? In other words, it is up to the proxy to communicate to others or the person filling it, how—how to help the person to do this with the family. (ID:3-1)

*Además en otros países también las decisiones médicas pertenecen al núcleo familiar. O sea, en Bolivia por ejemplo si yo estuviese enferma y tuviese esposo, le preguntarian cómo quiere que le tratemos a su esposa, qué le hacemos a los hijos, ¿no? O sea, que eso es una cosa natural, en cambio acá es un poco más privado, eso sin permiso no le van a estar pidiendo o algún documento, no le van a pedir al esposo o a la esposa la opinión. Entonces eso es una concientización y una educación que hay que dar a la gente, no, cómo se hacen esas cosas porque de dónde venimos no son prácticas regulares. (ID:3-3)*

Moreover, in other countries, medical decisions belong to the family nucleus. I mean, in Bolivia, for example, if I was sick and had a husband, they would ask him how he wants us to treat his wife, what do we do to the children, right? I mean, that's a natural thing, but here it's a little more private, that without permission they're not going to be asking or some document, they're not going to ask the husband or wife for their opinion. So that's an awareness and an education that needs to be given to people, no, how these things are done because where we come from they are not regular practices. (ID:3-3)

*Sería la más mayor, pero hablando con ella y le digo “Mira, tú sabes que no quiero que me entuben, no quiero nada artificial ni nada invasivo.” Me dice ... “No, yo no voy a permitir eso. Hay que hacerte esto y esto y esto.” Me quedé calladita pero he estado pensando y luego tengo que cambiarla. (ID:1-2)*

It would be the oldest, but talking to her and I tell her, “Look, you know I don't want to be intubated, I don't want anything artificial or anything invasive.” She says... “No, I'm not going to allow that. You have to do this and this and this and this.” I kept quiet but I've been thinking and then I have to change it [healthcare proxy]. (ID:1-2)

### **Inter-generational issues.**

*Yo creo que – no mucho ahora con la generación mía, pero la de mis padres y la de mis abuelos todo se lo dejan a Dios. Entonces, lo que Dios quiera eso es lo que va a pasar. “A mí no me importa dónde tú me pongas porque yo no voy a estar vivo, qué se yo, yo me voy para el cielo.” (ID:1-7)*

I think that— not much now with my generation, but my parents and grandparents leave everything to God. So whatever God wants, that's what's going to happen. “I don't care where you put me because I'm not going to be alive, what do I know, I'm going to heaven.” (ID:1-7)

*Bueno, en el caso de él y yo, somos de como una generación diferente a la de mis padres. Y no solamente generación si no que por ejemplo en contexto cultural es diferente. Pero personalmente yo lo veo como algo normal que simplemente – por ejemplo, sería grandioso si cuando uno entra como paciente nuevo a un centro médico parte de las preguntas o del formulario sea algo que haya en el récord médico de tipo de tratamiento o cuestiones que este paciente quiere que hagan con él o con ella en caso de que esté en una situación difícil que pueda ser de vida o muerte, cómo quiere que el centro médico reaccione ante eso. (ID:1-10)*

Well, in the case of him and I, we're from like a different generation than my parents. And not just generation, but for example in a cultural context it is different. But personally, I see it as something normal that simply - for example, it would be great if when you enter a medical center as a new patient, part of the questions or the form is something that is in the medical record of the type of treatment or things that this patient wants you to do with him or with her in case they are in a difficult situation that could be life or death, how you want the medical center to react to that. (ID:1-10)

### **Spiritual Beliefs.**

*... yo me crié en la iglesia y las personas que están en el hospital dicen “Llama al pastor, el pastor va a venir aquí. Va a orar por mí y yo me voy a sanar.” Y ya no quieren tener esa conversación (ID:1-7)*

... I grew up in the church and the people in the hospital say, “Call the pastor, the pastor will come here. He's going to pray for me and I'm going to heal.” And they don't want to have that conversation anymore. (ID:1-7)

Por lo menos han habido cosas pero muy pequeñas que yo he hablado con las hijas y ellas me dicen “Mami, mami no hables de eso. No hables de eso que Dios te va a sanar.” O sea, no les gusta, no les gusta. (ID:2-8)

At least there have been things but very small that I have talked about with the daughters and they tell me, “Mommy, mommy, don't talk about that. Don't talk about that because God will heal you.” In other words, they don't like it, they don't like it. (ID:2-8)

*Como por ejemplo, un tiempo como mi abuelo. Él siempre todos los días cuando él llega, él me dice “Ay Dios me cuida, ay Dios esto.” Y es cierto que ha cambiado mucho en las generaciones así y pues como mi abuelo él dice [ph] que a él no le gusta hablar nada de eso, yo le he preguntado y cosas así, pero a él no le gusta hablar. (ID:1-3)*

Like, for example, one time like my grandfather. He always every day when he arrives, he tells me “Oh God takes care of me, oh God this.” And it's true that it has changed a lot over the generations like this, and well because my grandfather says [ph] that he doesn't like to talk about anything like that, I've asked him and things like that, but he doesn't like to talk. (ID:1-3)

### **Cultural taboos.**

*Osea es un cambio cultural porque por lo menos yo crecí que no se habla de la muerte porque tú lo estás anticipando, pero se ha cambiado mucho. (ID:3-1)*

I mean, it's a cultural change because at least I grew up that we don't talk about death because you're anticipating it, but a lot has changed. (ID:3-1)

*El no hablar de lo de la muerte es muy, muy latino. Eso de “Ay me estás empabando. Cómo que me vas a decir que ay, ya me quieres matar.” (ID:2-5)*

Not talking about death is very, very Latino. That “Oh you're making me sick. You mean you're going to tell me that oh, you already want to kill me. (ID:2-5)

*Una de las barreras también sería que en nuestras culturas hablar de la muerte o de estar en los últimos auxilios no es un tema que es muy popular. Otro, a lo mejor sería el hecho de que las traducciones de lo que nos presentan no nos hablan en el lenguaje que tenemos. [Ella] habla de*

*de cómo se habla las cosas que se dicen en Puerto Rico, etc, etc. Para Bolivia, para Colombia, Ecuador definitivamente tiene que ser y mi sugerencia no es decir “esto es para los colombianos, esto es para los bolivianos,” pero más o menos el lenguaje tiene que ser un poquito más global pero también un poco más, no sé, como más suave. No tan diciendo “Ah! Te vas a morir!” (ID:3-3)*

One of the barriers would also be that in our cultures talking about death or being in the last of your days, is not very popular. Another, perhaps would be the fact that the translations of what they present to us do not speak to us in the language we have. [She] talks about how things are spoken in Puerto Rico, etc, etc. For Bolivia, for Colombia, Ecuador definitely has to be and my suggestion is not to say “this is for Colombians, this is for Bolivians,” but more or less the language has to be a little more global but also a little more, I don't know, softer. Not so much saying, “Ah! You're going to die! (ID:3-3)

### **ACP Understanding is Affected by Culture and Practices at Local Healthcare Providers**

#### **Explanations in Prior Healthcare Encounters are Poor.**

*En la emergencia me preguntaron,..., “¿Usted tiene un proxy?” Pero nunca lo han explicado, nadie lo ha explicado. Yo porque estamos en el puesto de los intérpretes y sabemos y todo, pero nadie me lo ha explicado. (ID:2-6)*

In the emergency department they asked me,..., “Do you have a proxy?” But they never explained it, nobody explained it. I for one am in the position of being an interpreter and we know and everything, but no one has explained it to me. (ID:2-6)

*... It's too many documents. Lo menos que yo lo veo es que muchos documentos pidiendo lo mismo en diferentes formas... (ID:2-3)*

...It's too many documents. The least I see it is that many documents are asking for the same thing in different ways... (ID:2-3)

*A nosotros nos pasa que cuando hemos ido con ella a algunas cirugías como yo casi siempre soy la que me he quedado con ella mientras está el procedimiento y eso, yo no soy familia directa de ella, yo soy la esposa de su hijo y a ella le preguntan “Mira, ¿quién puede tomar decisiones por ti?” Bueno, yo soy la que estoy ahí en ese momento, pero yo no me siento con la responsabilidad de tomar ninguna decisión por ella, si no ellos que son sus hijos. Entonces, ella a lo mejor o como estábamos diciendo, a lo mejor hemos firmado inconscientemente donde yo soy la que tengo que tomar la decisión y si mi Dios no quiera pasa la situación que me llamen a mí “Mira, qué vamos a hacer con ella porque tú eres la que firmaste y tú eres quien tiene que decidir.” Y yo me voy a quedar como – por eso, porque no lo explica. No lo explican. (ID:2-12)*

It happens to us that when we have been with her to some surgeries like how I am almost always the one who has stayed with her while the procedure is going on and such, I am not her immediate family, I am the wife of her son and she is asked “Look, who can make decisions for you?” Well, I'm the one who's there at the time, but I don't feel responsible to make any decisions for her, instead it should be them who are her children. So, maybe she

or as we were saying, maybe we have unconsciously signed where I am the one who has to make the decision and if God forbids the situation happens they call me “Look, what are we going to do with her because you are the one who signed and you are the one who has to decide.” And I’m going to be like — that’s why, because they don’t explain it. They don’t explain it. (ID:2-12)

Que haya algún tipo de explicación, no como que se le entregue el papel y punto, que fue lo que hicieron conmigo. (ID:3-1)

That there is some kind of explanation, not like having the paper handed to him, period, which is what they did to me. (ID:3-1)

*Y el otro documento. ¿Cuál es la diferencia? ¿Éste supercede el otro, el Health Care Proxy o el Health Care Proxy supercede éste? ¿O tienes que tener los dos? (ID:2-3)*

And the other document. What’s the difference? Does this one supersede the other, does the Health Care Proxy or the Health Care Proxy override this one? Or do you have to have both? (ID:2-3)

#### Group 2 Conversation

*ID:2-3 Ahora mismo yo tengo aquí dos documentos. Los dos están pidiendo nombres de los testigos, las firmas. Y éste también está pidiendo lo mismo. ¿Estos dos son \_\_\_\_\_ [paper shuffling] o esto es [ph]?*

*[Crosstalk]*

*ID: 2-12 En éste no puedes dar más especificación.*

*ID:2-3 Éste también.*

*ID:2-5 Éste es el mismo que éste..*

*ID:2-3 Pero ésta es la página donde dice que los testigos –*

*ID:2-5 Sí, esos dos son iguales, ¿no?*

*ID:2-3 Esta página donde tú pones los testigos es diferente a esta página.*

*ID:2-5 Porque lo están simplificando ahora.*

*ID:2-3 Por eso vuelvo y repito, muchos documentos y con la misma información.*

*ID:2-10 Con la misma información.*

ID:2-3 Right now I have two documents here. The two are asking for the names of the witnesses, the signatures. And this one is also asking for the same thing. Are these two \_\_\_\_\_ [paper shuffling] or is this [ph]?

[Crosstalk]

ID:2-12 In this one you can’t give any more details.

ID:2-3 This one too.

ID:2-5 This one is the same as this one.

ID:2-3 But this is the page where it says that witnesses —

ID:2-5 Yes, those two are the same, aren’t they?

ID:2-3 This page where you put the witnesses is different from this page.

ID:2-5 Because they’re simplifying it now.



ID:2-3 That's why I repeat, a lot of documents and with the same information.  
ID:2-10 With the same information.

### **Beyond the Healthcare Proxy.**

*También este documento lo que no me gusta es que si se ponen a leerlo, todavía no está claramente el que estos son los deseos tuyos. La persona a quien deseo designar para que tome decisiones. Cambien el “tome.” Para que siga mis decisiones en mi nombre cuando ya yo no las pueda hacer. Eso es lo que a mí me molesta de esto, que todavía está muy, muy confuso el que qué es un proxy. Y el proxy según lo que yo entiendo son tus deseos y la persona asignada es quien va a seguir tus deseos. No es que va a tomar decisiones en caso de que tú no puedas. Va a tomar las decisiones que tú querías cuando tú podías. Entonces, va a seguir. Entonces eso es lo que no me gusta de todos los documentos y de las explicaciones. Porque si tú entiendes qué es un proxy, las explicaciones, los documentos están mal, están mal. (ID:2-5)*

Also, what I don't like about this document is that if you start reading it, it is still not clear that these are your wishes. The person I want to appoint to make decisions. Change the “make.” So they can follow my decisions on my behalf when I can't make them anymore. That's what bothers me about this, that it is still very, very confusing what is a proxy. And the proxy according to what I understand is your wishes and the person assigned is the one who will follow your wishes. It's not that they are going to make decisions in case you can't. They are going to make the decisions you wanted when you were able to. So, they are going to follow. So that's what I don't like about all the documents and the explanations. Because if you understand what a proxy is, the explanations, the documents are not good, they are not good. (ID:2-5)

*Lo que le puede pasar a cualquier cultura, pero nosotros somos una cultura que la familia es súper importante. So, pienso que eso tiene que ser considerado cuando se planifican materiales. Y cuando se está ayudando a alguien escoger el proxy, ¿cómo puede ese proxy —? O sea, le toca al proxy comunicar a los otros o a la persona que lo está llenando, cómo — cómo se ayuda a la persona a poder hacer esto con la familia. (ID: 3-1)*

What can happen to any culture, but we are a culture where family is super important. So, I think that has to be considered when planning materials. And when you're helping someone choose the proxy, how can that proxy —? In other words, it is up to the proxy to tell the others or to the person who is filling it out, how — how to help the person to be able to do this with the family. (ID:3-1)

### **ACP Needs to be Normalized into Local Communities**

#### **Beyond the Healthcare Setting.**

*Entiendo que tal vez en las mismas comunidades. Aquí hay muchas comunidades que tienen como un centro local o un centro comunal. Que hagan un — vengan con sus familiares, vamos a hablar de un tema importante aunque sea una vez al año. (ID:2-9)*

I understand that perhaps in the communities themselves. Here there are many communities that have like a local center or a communal center. They should do a – come with your family members, we are going to talk about an important topic even if it is one time per year. (ID:2-9)

*Yo pertenezco a una institución religiosa y yo formo parte del equipo médico de esa iglesia. Y entonces, por ejemplo, a veces me ponen para dar charlas ...en una iglesia hispana también y pienso que por ejemplo ahora con esto que está sucediendo ahora, se me hace que puedo hablar con mi pastor para sugerirle que empezamos a implementar eso en la iglesia. Creo en una manera de entonces llevarlo – difundirlo. (ID:3-2)*

I belong to a religious institution and I am part of the medical team of that church. And so, for example, sometimes they put me to give talks... in a Hispanic church as well and I think that for example now with this that is happening now, I'm thinking that I can talk to my pastor to suggest that we start implementing that in the church. I believe it can be a way to drive it — spread it. (ID:3-2)

### **Longitudinal Timing.**

*Pero yo creo que el enfocarse en que esto es una cosa anticipada es lo más importante. Que esto debería de ser con los doctores primarios en tu chequeo anual que tienes 30 años que hacerlo 30 veces en el sentido en que te expliquen. (ID:2-5)*

But I think that focusing on the fact that this is an anticipated thing is most important. That this should be with primary care doctors at your annual check-up that you have 30 years to do it 30 times in the sense that they explain it to you. (ID:2-5)

*...Pero ahora siendo viuda es muy importante para mí preparar mi futuro y cual de mis hijos escoger en ese sentido. Entonces por eso es que te digo no es la edad, no es que estés enfermo, si no que estar más preparado y también preparar más a tu familia, que no le estás dando la carga de que ellos vayan a decidir por ti, si no que eso es lo que tú quieres y entonces es una paz mental, una paz de corazón que aunque no estén de acuerdo, eso es lo que mi mamá quería. (ID:2-5)*

...But now being a widow it is very important for me to prepare my future and which of my children to choose in that regard. So that's why I tell you it's not age, it's not when you're sick, it's about being more prepared and also preparing your family more, that you're not giving them the burden of them deciding for you, it's what you want and so it's a peace of mind, a peace of heart that even if they don't agree, that's what my mom wanted. (ID:2-5)

### **Knowledge and Education.**

**ID:2-9** *...incluir en el mismo folleto algo que sea cómo se lo da a la persona que uno autoriza. Por ejemplo, mira estos son mis Cinco Deseos pero esta parte es para ti como mi proxy de leer y que ahí le explica a la persona usted no toma la decisión. Que le explique claramente a la*

*persona que usted le va a dar... Mira, esto es para el proxy. Éstas son las cosas que tienes que hacer, estos son tus derechos pero por encima explicar [ph] lo que es el deseo.*

**ID:2-5** *La responsabilidad.*

**ID:2-9** *Yeah, explicándolo porque aquí dice yo lo mío, lo mío y uno lo llena pero y para la persona. Entonces, OK, ¿qué hago? Tome, doctor. Lo tengo aquí, ¿qué tengo que hacer? Entonces estaría chévere que diga usted como proxy está haciendo esto, aunque sea una notita o algo o un panfleto aparte ahora que eres el proxy. Entonces, esto es – Y eso estaría chévere para la persona que no lo entienda.*

**ID:2-9** ...include in the same brochure something that is to give it to the person you authorize. For example, look these are my Five Wishes but this part is for you as my proxy to read and explain to the person you don't make the decision. To clearly explain to the person you are going to give them... Look, this is for the proxy. These are the things you have to do, these are your rights but also explain [ph] what the desire is.

**ID:2-5** Responsibility.

**ID:2-9** Yeah, explaining it because here it says my things, mine and one fills it out and for the person. So, OK, what do I have to do? Here, doctor. I have it here, what do I have to do? Then it would be nice if you say as a proxy that you are doing this, even if it's a small note or something or a separate pamphlet that now you're the proxy. So, this is it— And that would be nice for the person who doesn't understand it.

## COREQ (Consolidated criteria for REporting Qualitative research) Checklist

A checklist of items that should be included in reports of qualitative research

| Topic                                          | Item No. | Guide Questions/ Description                                                                                                                             | Author Responses                                                                                            |
|------------------------------------------------|----------|----------------------------------------------------------------------------------------------------------------------------------------------------------|-------------------------------------------------------------------------------------------------------------|
| <b>Domain 1: Research team and reflexivity</b> |          |                                                                                                                                                          |                                                                                                             |
| <i>Personal Characteristics</i>                |          |                                                                                                                                                          |                                                                                                             |
| Interviewer/facilitator                        | 1        | Which author/s conducted the interview or focus group?                                                                                                   | Methods: Study Procedures                                                                                   |
| Credentials                                    | 2        | What were the researcher's credentials? E.g. PhD, MD                                                                                                     | Methods: Study Procedures                                                                                   |
| Occupation                                     | 3        | What was their occupation at the time of the study?                                                                                                      | Methods: Study Procedures                                                                                   |
| Gender                                         | 4        | Was the researcher male or female?                                                                                                                       | N/A                                                                                                         |
| Experience and training                        | 5        | What experience or training did the researcher have?                                                                                                     | Methods: Study Procedures                                                                                   |
| <i>Relationship with participants</i>          |          |                                                                                                                                                          |                                                                                                             |
| Relationship established                       | 6        | Was a relationship established prior to study commencement?                                                                                              | Methods: Study Procedures                                                                                   |
| Participant knowledge of the interviewer       | 7        | What did the participants know about the researcher? e.g. personal goals, reasons for doing the research                                                 | Supplemental File: Interview Guide and Interview Probe Supplement in Spanish and English (efigures 1 and 2) |
| Interviewer characteristics                    | 8        | What characteristics were reported about the interviewer/facilitator? e.g. Bias, assumptions, reasons and interests in the research topic                | Supplemental File: Interview Guide and Interview Probe Supplement in Spanish and English (efigures 1 and 2) |
| <b>Domain 2: Study design</b>                  |          |                                                                                                                                                          |                                                                                                             |
| <i>Theoretical framework</i>                   |          |                                                                                                                                                          |                                                                                                             |
| Methodological orientation and Theory          | 9        | What methodological orientation was stated to underpin the study? e.g. grounded theory, discourse analysis, ethnography, phenomenology, content analysis | Methods: Study Design AND Methods: Data Analysis                                                            |
| Sampling                                       | 10       | How were participants selected? e.g. purposive, convenience, consecutive, snowball                                                                       | Methods: Study Participants, Recruitment & Eligibility                                                      |

|                                        |    |                                                                                   |                                                                                                                                                                        |
|----------------------------------------|----|-----------------------------------------------------------------------------------|------------------------------------------------------------------------------------------------------------------------------------------------------------------------|
| Method of approach                     | 11 | How were participants approached? e.g. face-to-face, telephone, mail, email       | Methods: Study Participants, Recruitment & Eligibility                                                                                                                 |
| Sample size                            | 12 | How many participants were in the study?                                          | Results: First Paragraph                                                                                                                                               |
| Non-participation                      | 13 | How many people refused to participate or dropped out? Reasons?                   | Methods: Study Procedures                                                                                                                                              |
| <u>Setting</u>                         |    |                                                                                   |                                                                                                                                                                        |
| Setting of data collection             | 14 | Where was the data collected? e.g. home, clinic, workplace                        | Methods: Study Procedures                                                                                                                                              |
| Presence of non-participants           | 15 | Was anyone else present besides the participants and researchers?                 | Methods: Study Procedures                                                                                                                                              |
| Description of sample                  | 16 | What are the important characteristics of the sample? e.g. demographic data, date | Results: First Paragraph AND Table 1                                                                                                                                   |
| <u>Data collection</u>                 |    |                                                                                   |                                                                                                                                                                        |
| Interview guide                        | 17 | Were questions, prompts, guides provided by the authors? Was it pilot tested?     | Methods: Data Collection AND Methods: Study Procedures AND Supplemental File: Interview Guide and Interview Probe Supplement in Spanish and English (efigures 1 and 2) |
| Repeat interviews                      | 18 | Were repeat interviews carried out? If yes, how many?                             | Methods: Study Procedures                                                                                                                                              |
| Audio/visual recording                 | 19 | Did the research use audio or visual recording to collect the data?               | Methods: Study Procedures                                                                                                                                              |
| Field notes                            | 20 | Were field notes made during and/or after the interview or focus group?           | Methods: Study Procedures                                                                                                                                              |
| Duration                               | 21 | What was the duration of the interviews or focus group?                           | Methods: Study Procedures                                                                                                                                              |
| Data saturation                        | 22 | Was data saturation discussed?                                                    | Methods: Study Procedures                                                                                                                                              |
| Transcripts returned                   | 23 | Were transcripts returned to participants for comment and/or corrections?         | N/A                                                                                                                                                                    |
| <b>Domain 3: analysis and findings</b> |    |                                                                                   |                                                                                                                                                                        |
| <u>Data analysis</u>                   |    |                                                                                   |                                                                                                                                                                        |
| Number of data coders                  | 24 | How many data coders coded the data?                                              | Methods: Data Analysis                                                                                                                                                 |

|                                |    |                                                                                                                                    |                                                                                                                                                  |
|--------------------------------|----|------------------------------------------------------------------------------------------------------------------------------------|--------------------------------------------------------------------------------------------------------------------------------------------------|
| Description of the coding tree | 25 | Did authors provide a description of the coding tree?                                                                              | N/A                                                                                                                                              |
| Derivation of themes           | 26 | Were themes identified in advance or derived from the data?                                                                        | Methods: Data Analysis                                                                                                                           |
| Software                       | 27 | What software, if applicable, was used to manage the data?                                                                         | Methods: Data Analysis                                                                                                                           |
| Participant checking           | 28 | Did participants provide feedback on the findings?                                                                                 | Methods: Data Analysis                                                                                                                           |
| <i>Reporting</i>               |    |                                                                                                                                    |                                                                                                                                                  |
| Quotations presented           | 29 | Were participant quotations presented to illustrate the themes/findings?<br>Was each quotation identified? e.g. participant number | Results (All Sections) AND Supplemental File: Full Text of Exemplar Quotes in Spanish and English with Supplemental Quotes, by Theme (efigure 3) |
| Data and findings consistent   | 30 | Was there consistency between the data presented and the findings?                                                                 | Results AND Discussion (All Sections) AND Table 2                                                                                                |
| Clarity of major themes        | 31 | Were major themes clearly presented in the findings?                                                                               | Results: First Paragraph AND Figure 1                                                                                                            |
| Clarity of minor themes        | 32 | Is there a description of diverse cases or discussion of minor themes?                                                             | Results (All Sections) AND Figure 1                                                                                                              |

Developed from: Tong A, Sainsbury P, Craig J. Consolidated criteria for reporting qualitative research (COREQ): a 32-item checklist for interviews and focus groups. *International Journal for Quality in Health Care*. 2007. Volume 19, Number 6: pp. 349 – 357

**Additional Guidelines for Completing the COREQ Checklist for *Journal of Applied Gerontology*:**

- This checklist will be published online as supplementary material and we require it to be in the form of a publishable table. Please make sure that material does not bleed outside of cells, etc.
- This checklist is designed to direct readers to relevant material in the manuscript. Where applicable, please direct readers to various sections of the manuscript, such as a Methods section, Conceptual Framework, table or figure. Pages may shift during the publication process so please avoid directing readers to specific page numbers.
- This checklist also is designed to supplement information that may not be reported in the text and/or provide additional details related to information that is reported in the text.

**Once you have completed this checklist, please save a copy and upload an anonymized version of it as part of your *Journal of Applied Gerontology* submission. DO NOT include this checklist as part of the main manuscript document. It must be uploaded as a separate supplemental file. If the paper is**

**accepted, a non-anonymized version should be provided with the final submission of the main manuscript.**
